# Supplementary material for: Cost-Effectiveness Analysis of Ranibizumab Biosimilar for Neovascular Age-Related Macular Degeneration in Japan
Source: PubMed Central journal article supplement — Ophthalmol Ther. 2023 May 12;12(4):2005–21. doi: 10.1007/s40123-023-00715-y (PMC10287869; doi:10.1007/s40123-023-00715-y), 2023-05-12
Supplement: 40123_2023_715_MOESM1_ESM.pdf [file 40123_2023_715_MOESM1_ESM.pdf]

## SUPPLEMENTARY MATERIALS

**Title:** Cost-effectiveness Analysis of Ranibizumab Biosimilar for Neovascular Age-related Macular Degeneration in Japan

**Authors:** Yasuo Yanagi<sup>1</sup>, Kanji Takahashi<sup>2</sup>, Tomohiro Iida<sup>3</sup>, Fumi Gomi<sup>4</sup>, Junko Morii<sup>5</sup>, Eriko Kunikane<sup>6</sup>, Taiji Sakamoto<sup>7</sup>

**Affiliations:**

- 1) Department of Ophthalmology and Microtechnology, Yokohama City University, Kanagawa, Japan.
- 2) Department of Ophthalmology, Kansai Medical University, Osaka, Japan.
- 3) Department of Ophthalmology, Tokyo Women's Medical University School of Medicine, Tokyo, Japan.
- 4) Department of Ophthalmology, Hyogo Medical University, Hyogo, Japan.
- 5) IQVIA Solutions Japan, K.K., Tokyo, Japan.
- 6) Senju Pharmaceutical Co., Ltd., Osaka, Japan.
- 7) Department of Ophthalmology, Kagoshima University Graduate School of Medical and Dental Sciences, Kagoshima, Japan.

**Corresponding author:** Yasuo Yanagi

**Supplementary Table S1: Overview of transition probabilities and treatment frequencies**

| <b>Time Period</b>         | <b>Treatment and Regimen</b> | <b>Source</b>              |
|----------------------------|------------------------------|----------------------------|
| Induction (first 3 months) | RBZ BS TAE<br>RBZ TAE        | RIVAL [1]                  |
|                            | RBZ PRN                      | CATT [2]                   |
|                            | AFL TAE                      | (Base case) RIVAL [1]      |
|                            |                              | (Scenario) Ohji et al. [3] |
| Maintenance: Year 1–2      | RBZ BS TAE<br>RBZ TAE        | RIVAL [1]                  |
|                            | RBZ PRN                      | CATT [2, 4]                |
|                            | AFL TAE                      | (Base case) RIVAL [1]      |
|                            |                              | (Scenario) Ohji et al. [3] |
| Maintenance: Year $\geq 3$ | RBZ BS TAE<br>RBZ TAE        | CANTREAT [5]               |
|                            | RBZ PRN                      | CATT [6]                   |
|                            | AFL TAE                      | CANTREAT [5]               |
| BSC and off-treatment      |                              | Wong et al. (2008) [7]     |

AFL: aflibercept; BS: biosimilar; BSC: best supportive care; PRN: pro re-nata; RBZ: ranibizumab; TAE: treat-and-extend.

**Supplementary Table S2: Transition probabilities**

| Sub-health State-transition                       | RBZ BS TAE | RBZ PRN BS | RBZ TAE | RBZ PRN | AFL TAE | AFL to RBZ BS TAE | BSC    |
|---------------------------------------------------|------------|------------|---------|---------|---------|-------------------|--------|
| Base case                                         |            |            |         |         |         |                   |        |
| Induction (for the first 3 months)                |            |            |         |         |         |                   |        |
| Improving 1 health state                          | 17.50%     | 17.50%     | 17.50%  | 17.50%  | 13.65%  | 13.65%            | 0.00%  |
| Improving 2 health states                         | 1.17%      | 1.17%      | 1.17%   | 1.17%   | 0.68%   | 0.68%             | 0.00%  |
| Worsening 1 health state                          | 3.07%      | 3.07%      | 3.07%   | 3.07%   | 4.02%   | 4.02%             | 14.10% |
| Worsening 2 health states                         | 0.06%      | 0.06%      | 0.06%   | 0.06%   | 0.08%   | 0.08%             | 10.10% |
| Maintenance: Year 1 (Months 4–12)                 |            |            |         |         |         |                   |        |
| Improving 1 health state                          | 12.75%     | 13.66%     | 12.75%  | 13.66%  | 13.43%  | 12.75%            | 0.00%  |
| Improving 2 health states                         | 1.04%      | 1.48%      | 1.04%   | 1.48%   | 1.33%   | 1.04%             | 0.00%  |
| Worsening 1 health state                          | 8.35%      | 9.58%      | 8.35%   | 9.58%   | 9.06%   | 8.35%             | 12.90% |
| Worsening 2 health states                         | 0.51%      | 0.81%      | 0.51%   | 0.81%   | 0.68%   | 0.51%             | 18.20% |
| Maintenance: Year 2                               |            |            |         |         |         |                   |        |
| Improving 1 health state                          | 12.51%     | 13.09%     | 12.51%  | 13.09%  | 11.90%  | 12.51%            | 0.00%  |
| Improving 2 health states                         | 1.74%      | 1.96%      | 1.74%   | 1.96%   | 1.23%   | 1.74%             | 0.00%  |
| Worsening 1 health state                          | 13.54%     | 13.35%     | 13.54%  | 13.35%  | 11.63%  | 13.54%            | 27.00% |
| Worsening 2 health states                         | 1.99%      | 2.03%      | 1.99%   | 2.03%   | 1.18%   | 1.99%             | 28.30% |
| Maintenance: ≥Year 3                              |            |            |         |         |         |                   |        |
| Improving 1 health state                          | 2.20%      | 0.16%      | 2.20%   | 0.16%   | 2.20%   | 2.20%             | 0.00%  |
| Improving 2 health states                         | 0.01%      | 0.00%      | 0.01%   | 0.00%   | 0.01%   | 0.01%             | 0.00%  |
| Worsening 1 health state                          | 4.10%      | 4.83%      | 4.10%   | 4.83%   | 4.10%   | 4.10%             | 27.00% |
| Worsening 2 health states                         | 0.02%      | 0.00%      | 0.02%   | 0.00%   | 0.02%   | 0.02%             | 28.30% |
| Scenario by the indirect treatment comparison [3] |            |            |         |         |         |                   |        |

| <b>Sub-health State-transition</b>        | <b>RBZ BS TAE</b> | <b>RBZ PRN BS</b> | <b>RBZ TAE</b> | <b>RBZ PRN</b> | <b>AFL TAE</b> | <b>AFL to RBZ BS TAE</b> | <b>BSC</b> |
|-------------------------------------------|-------------------|-------------------|----------------|----------------|----------------|--------------------------|------------|
| <b>Induction (for the first 3 months)</b> |                   |                   |                |                |                |                          |            |
| Improving 1 health state                  | 17.50%            | 17.50%            |                |                | 17.29%         |                          |            |
| Improving 2 health states                 | 1.17%             | 1.17%             |                |                | 1.14%          |                          |            |
| Worsening 1 health state                  | 3.07%             | 3.07%             |                |                | 3.13%          |                          |            |
| Worsening 2 health states                 | 0.06%             | 0.06%             |                |                | 0.06%          |                          |            |
| <b>Maintenance: Year 1 (Months 4–12)</b>  |                   |                   |                |                |                |                          |            |
| Improving 1 health state                  | 12.75%            | 12.75%            |                |                | 12.59%         |                          |            |
| Improving 2 health states                 | 1.04%             | 1.04%             |                |                | 1.02%          |                          |            |
| Worsening 1 health state                  | 8.35%             | 8.35%             |                |                | 8.47%          |                          |            |
| Worsening 2 health states                 | 0.51%             | 0.51%             |                |                | 0.52%          |                          |            |
| <b>Maintenance: Year 2</b>                |                   |                   |                |                |                |                          |            |
| Improving 1 health state                  | 12.51%            | 12.51%            |                |                | 12.38%         |                          |            |
| Improving 2 health states                 | 1.74%             | 1.74%             |                |                | 1.71%          |                          |            |
| Worsening 1 health state                  | 13.54%            | 13.54%            |                |                | 13.67%         |                          |            |
| Worsening 2 health states                 | 1.99%             | 1.99%             |                |                | 2.03%          |                          |            |
| <b>Maintenance: ≥Year 3</b>               |                   |                   |                |                |                |                          |            |
| Improving 1 health state                  | 2.20%             | 2.20%             |                |                | 2.20%          |                          |            |
| Improving 2 health states                 | 0.01%             | 0.01%             |                |                | 0.01%          |                          |            |
| Worsening 1 health state                  | 4.10%             | 4.10%             |                |                | 4.10%          |                          |            |
| Worsening 2 health states                 | 0.02%             | 0.02%             |                |                | 0.02%          |                          |            |

AFL: aflibercept; BS: biosimilar; BSC: best supportive care; PRN: pro re-nata; RBZ: ranibizumab; TAE: treat-and-extend.

**Supplementary Table S3: Treatment frequencies**

| Treatment                                         | Frequency in Induction Phase (for the First 3 Months) | Frequency in Maintenance Phase (per cycle) |        |         |
|---------------------------------------------------|-------------------------------------------------------|--------------------------------------------|--------|---------|
|                                                   |                                                       | Year 1                                     | Year 2 | Year ≥3 |
| Base case                                         |                                                       |                                            |        |         |
| RBZ BS TAE                                        | 3.0                                                   | 2.23                                       | 2.23   | 1.83    |
| RBZ BS PRN                                        | 3.0                                                   | 1.30                                       | 1.43   | 1.28    |
| RBZ TAE                                           | 3.0                                                   | 2.23                                       | 2.23   | 1.83    |
| RBZ PRN                                           | 3.0                                                   | 1.30                                       | 1.43   | 1.28    |
| AFL TAE                                           | 3.0                                                   | 2.23                                       | 2.08   | 1.83    |
| AFL to RBZ BS TAE                                 | 3.0                                                   | 2.23                                       | 2.23   | 1.83    |
| Scenario by the indirect treatment comparison [3] |                                                       |                                            |        |         |
| RBZ BS TAE                                        | 3.0                                                   | 2.23                                       | 2.23   | 1.83    |
| RBZ TAE                                           | 3.0                                                   | 2.23                                       | 2.23   | 1.83    |
| AFL TAE                                           | 3.0                                                   | 1.23                                       | 1.48   | 1.48    |

AFL: aflibercept; BS: biosimilar; PRN: pro re-nata; RBZ: ranibizumab; TAE: treat-and-extend.

**Supplementary Table S4: Annual incidence of fellow-eye involvement and annual discontinuation rate**

| Parameter                                  | Values | Source          |
|--------------------------------------------|--------|-----------------|
| Annual incidence of fellow-eye involvement |        |                 |
| Year 1                                     | 3.40%  | Ueta et al. [8] |
| Year 2                                     | 2.95%  |                 |
| Year 3                                     | 2.95%  |                 |
| Annual discontinuation rate                |        |                 |
| Induction: for the first 3 months          | 1.88%  | Expert opinion  |
| Maintenance: Year 1                        | 5.63%  |                 |
| Maintenance: Year 2                        | 15.00% |                 |
| Maintenance: Year $\geq$ 3                 | 15.00% |                 |

**Supplementary Table S5: Annual rate of adverse events**

| <b>Adverse Events Affecting Utility</b> | <b>Disutility</b> | <b>RBZ BS TAE</b> | <b>RBZ TAE</b> | <b>RBZ PRN</b> | <b>RBZ BS PRN</b> | <b>AFL TAE</b> | <b>AFL to RBZ BS TAE</b> | <b>BSC</b> |
|-----------------------------------------|-------------------|-------------------|----------------|----------------|-------------------|----------------|--------------------------|------------|
| Retinal artery embolism/occlusion       | 0.14              | 0.70%             | 0.70%          | 0.70%          | 0.70%             | 0.00%          | 0.70%                    | 0.00%      |
| End-ophthalmitis                        | 0.30              | 0.00%             | 0.00%          | 0.00%          | 0.00%             | 0.70%          | 0.00%                    | 0.00%      |
| Traumatic lens injury                   | 0.14              | 0.35%             | 0.35%          | 0.00%          | 0.00%             | 0.00%          | 0.35%                    | 0.00%      |
| Retinal detachment                      | 0.27              | 0.00%             | 0.00%          | 0.00%          | 0.00%             | 0.70%          | 0.00%                    | 0.00%      |

AFL: aflibercept; BS: biosimilar; BSC: best supportive care; PRN: pro re-nata; RBZ: ranibizumab; TAE: treat-and-extend.

**Supplementary Table S6: Health utility data (Yanagi et al. [9])**

| <b>Health State</b>                           | <b>Single Eye*</b> | <b>Both Eye†</b> |
|-----------------------------------------------|--------------------|------------------|
| No visual impairment ( $1 \geq BCVA > 0.8$ )  | 0.777              | 0.777            |
| Mild impairment ( $0.8 \geq BCVA > 0.4$ )     | 0.752              | 0.741            |
| Moderate impairment ( $0.4 \geq BCVA > 0.2$ ) | 0.727              | 0.686            |
| Severe impairment ( $0.2 \geq BCVA > 0.05$ )  | 0.702              | 0.614            |
| Blindness ( $0.05 \geq BCVA \geq 0$ )         | 0.677              | 0.500            |
| Death                                         | 0.000              | 0.000            |

BCVA: best-corrected visual acuity.

\*Utility is derived based on the worse-seeing eye.

†Utility is derived based on the better-seeing eye.

**Supplementary Table S7: Drug acquisition cost, intravitreal injection fee and adverse event cost**

| Item                              | Details                                                                                     | Cost (JPY, as of April 2022) | Source                                                        |
|-----------------------------------|---------------------------------------------------------------------------------------------|------------------------------|---------------------------------------------------------------|
| Drug acquisition cost             |                                                                                             |                              |                                                               |
| RBZ BS                            | Ranibizumab BS intravitreal injection kit 10 mg/mL                                          | 79,348.0                     | MHLW [10]                                                     |
| RBZ (Lucentis®)                   | Lucentis kit for intravitreal injection 10 mg/mL                                            | 113,702.0                    |                                                               |
| AFL (Eylea®)                      | Eylea kit for intravitreal injection 40 mg/mL                                               | 137,292.0                    |                                                               |
| Intravitreal Injection fee        |                                                                                             |                              |                                                               |
| Intravitreal injection            | Code G016 (intravitreal injection)                                                          | 5,800/time                   | MHLW, Physician fee schedule as of fiscal year 2022 [11]      |
| Adverse event cost                |                                                                                             |                              |                                                               |
| Retinal artery embolism/occlusion | Assuming vasodilators, thrombolytics, IOP-lowering eye drops or surgery (expert opinion)    | 9086.5                       | Expert opinion and the Physician Fee Schedule as of 2022 [11] |
| End-ophthalmitis                  | Code K279 (vitrectomy anterior approach and vitrectomy pars plana approach)                 | 156,622.0                    |                                                               |
| Traumatic lens injury             | Procedure used: inpatient ophthalmology stay (1–2 days, depends on patient vs. nurse ratio) | 178,400.0                    |                                                               |
| Retinal detachment                | Code K277 (cryotherapy to region of the retina)                                             | 389,500.0                    |                                                               |

AFL: aflibercept; BS: biosimilar; IOP: intraocular pressure; JPY: Japanese Yen; MHLW: Ministry of Health, Labour and Welfare; RBZ: ranibizumab

**Supplementary Table S8: Costs and resource utilization regarding monitoring and management**

| Cost by Category            | Unit Cost<br>(JPY, as of<br>April 2022) | Resource Utilisation (per Cycle) |                            |         |                      |      | Source                                                                 |
|-----------------------------|-----------------------------------------|----------------------------------|----------------------------|---------|----------------------|------|------------------------------------------------------------------------|
|                             |                                         | RBZ BS TAE<br>& RBZ TAE          | RBZ BS<br>PRN & RBZ<br>PRN | AFL TAE | AFL to RBZ<br>BS TAE | BSC  |                                                                        |
| Year 1                      |                                         |                                  |                            |         |                      |      |                                                                        |
| Physician visit             | 740.0                                   | 2.00                             | 3.00                       | 2.00    | 2.00                 | 1.00 | Expert opinion and<br>the Physician Fee<br>Schedule as of 2022<br>[11] |
| OCT                         | 2,000.0                                 | 2.00                             | 3.00                       | 2.00    | 2.00                 | 1.00 |                                                                        |
| Slit-lamp biomicroscopy     | 1,120.0                                 | 2.00                             | 3.00                       | 2.00    | 2.00                 | 1.00 |                                                                        |
| Fluorescence<br>angiography | 4,000.0                                 | 0.25                             | 0.25                       | 0.25    | 0.25                 | 0.5  |                                                                        |
| Year ≥2                     |                                         |                                  |                            |         |                      |      |                                                                        |
| Physician visit             | 740.0                                   | 1.50                             | 2.25                       | 1.50    | 1.50                 | 1.00 | Expert opinion and<br>the Physician Fee<br>Schedule as of 2022<br>[11] |
| OCT                         | 2,000.0                                 | 1.50                             | 2.25                       | 1.50    | 1.50                 | 1.00 |                                                                        |
| Slit-lamp biomicroscopy     | 1,120.0                                 | 1.50                             | 2.25                       | 1.50    | 1.50                 | 1.00 |                                                                        |
| Fluorescence<br>angiography | 4,000.0                                 | 0.25                             | 0.25                       | 0.25    | 0.25                 | 0.5  |                                                                        |

AFL: aflibercept; BS: biosimilar; BSC: best supportive care; JPY: Japanese Yen; OCT: optical coherence tomography; PRN: pro re-nata; RBZ: ranibizumab; TAE: treat-and-extend.

**Supplementary Table S9: Societal costs (productivity loss of informal caregivers)**

| Parameter                                     | Single Eye  | Both Eyes   | Source                                                                                                                                                                                                                                                             |
|-----------------------------------------------|-------------|-------------|--------------------------------------------------------------------------------------------------------------------------------------------------------------------------------------------------------------------------------------------------------------------|
| Physician visit (annual)                      |             |             |                                                                                                                                                                                                                                                                    |
| No visual impairment                          | No          | No          | <ul style="list-style-type: none"> <li>Physician visit was calculated based on (Transportation cost) + (Visiting physician [one day loss])</li> <li>Average daily wage in the Japanese labours: ¥15,218.2 (Basic Survey on Wage Structure in 2021 [12])</li> </ul> |
| Mild impairment                               | No          | Yes         |                                                                                                                                                                                                                                                                    |
| Moderate impairment                           | Yes         | Yes         |                                                                                                                                                                                                                                                                    |
| Severe impairment                             | Yes         | Yes         |                                                                                                                                                                                                                                                                    |
| Blindness                                     | Yes         | Yes         |                                                                                                                                                                                                                                                                    |
| Daily care costs (annual) (JPY)               |             |             |                                                                                                                                                                                                                                                                    |
| No visual impairment ( $1 \geq BCVA > 0.8$ )  | 0.0         | 0.0         | <ul style="list-style-type: none"> <li>Based on expert opinions for productivity loss of caregivers</li> <li>Average daily wage in the Japanese labours: ¥15,218.2 (Basic Survey on Wage Structure in 2021 [12])</li> </ul>                                        |
| Mild impairment ( $0.8 \geq BCVA > 0.4$ )     | 0.0         | 913,091.0   |                                                                                                                                                                                                                                                                    |
| Moderate impairment ( $0.4 \geq BCVA > 0.2$ ) | 547,855.0   | 1,095,709.0 |                                                                                                                                                                                                                                                                    |
| Severe impairment ( $0.2 \geq BCVA > 0.05$ )  | 1,095,709.0 | 2,739,273.0 |                                                                                                                                                                                                                                                                    |
| Blindness ( $0.05 \geq BCVA \geq 0$ )         | 1,826,182.0 | 5,478,545.0 |                                                                                                                                                                                                                                                                    |

BCVA: best-corrected visual acuity; JPY: Japanese Yen.

**Supplementary Table S10: PSA distributions by parameter**

| <b>Parameter</b>                       | <b>PSA distribution</b> |
|----------------------------------------|-------------------------|
| Treatment-specific parameters          |                         |
| Transition probabilities               | Beta                    |
| Treatment frequencies                  | Gamma                   |
| Adverse event rate                     | Beta                    |
| Discontinuation rate                   | Beta                    |
| Incidence of fellow-eye involvement    | Beta                    |
| Resource use parameters                |                         |
| Monitoring and management resource use | Gamma                   |
| Cost parameters                        |                         |
| Treatment administration costs         | Gamma                   |
| Monitoring and management resource use | Gamma                   |
| Adverse event costs                    | Gamma                   |
| Societal costs                         | Gamma                   |
| Utility parameters                     |                         |
| Utilities                              | Beta                    |

PSA: probabilistic sensitivity analysis.

## REFERENCES

1. Gillies MC, Hunyor AP, Arnold JJ, et al. Macular atrophy in neovascular age-related macular degeneration: a randomized clinical trial comparing ranibizumab and aflibercept (RIVAL study). *Ophthalmology*. 2020;127(2):198-210.
2. Martin DF, Maguire MG, Ying GS, Grunwald JE, Fine SL, Jaffe GJ. Ranibizumab and bevacizumab for neovascular age-related macular degeneration. *N Engl J Med*. 2011;364(20):1897-908.
3. Ohji M, Lanzetta P, Korobelnik JF, et al. Efficacy and treatment burden of intravitreal aflibercept versus intravitreal ranibizumab treat-and-extend regimens at 2 years: network meta-analysis incorporating individual patient data meta-regression and matching-adjusted indirect comparison. *Adv Ther*. 2020;37(5):2184-98.
4. Martin DF, Maguire MG, Fine SL, et al. Ranibizumab and bevacizumab for treatment of neovascular age-related macular degeneration: two-year results. *Ophthalmology*. 2012;119(7):1388-98.
5. Kertes PJ, Sheidow T, Williams G, Greve M, Galic IJ, Baker J. Long-term efficacy of a treat-and-extend regimen with ranibizumab in patients with neovascular age-related macular disease: an open-label 12-month extension to the CANTREAT study. *Ophthalmologica*. 2021.
6. Maguire MG, Martin DF, Ying GS, et al. Five-year outcomes with anti-vascular endothelial growth factor treatment of neovascular age-related macular degeneration: the comparison of age-related macular degeneration treatments trials. *Ophthalmology*. 2016;123(8):1751-61.
7. Wong TY, Chakravarthy U, Klein R, et al. The natural history and prognosis of neovascular age-related macular degeneration: a systematic review of the literature and meta-analysis. *Ophthalmology*. 2008;115(1):116-26.
8. Ueta T, Iriyama A, Francis J, et al. Development of typical age-related macular degeneration and polypoidal choroidal vasculopathy in fellow eyes of Japanese patients with exudative age-related macular degeneration. *Am J Ophthalmol*. 2008;146(1):96-101.
9. Yanagi Y, Fukuda A, Barzey V, Adachi K. Cost-effectiveness of intravitreal aflibercept versus other treatments for wet age-related macular degeneration in Japan. *J Med Econ*. 2017;20(2):204-12.
10. Ministry of Health, Labor and Welfare (MHLW). [Regarding the information on National Health Insurance Drug Price List and generic drugs] (in Japanese) [updated 09-Dec-2022]. Available from: <https://www.mhlw.go.jp/topics/2022/04/tp20220401-01.html>.
11. Ministry of Health, Labor and Welfare (MHLW). [Regarding the revision of physician fee schedule in fiscal year 2022 (Reiwa-4 Nendo)] (in Japanese) [Available from: [https://www.mhlw.go.jp/stf/seisakunitsuite/bunya/0000188411\\_00037.html](https://www.mhlw.go.jp/stf/seisakunitsuite/bunya/0000188411_00037.html)].
12. Ministry of Health, Labor and Welfare (MHLW). [Basic Survey on Wage Structure in 2021] (in Japanese) 2021 [cited [2022 29 April]]. Available from: <https://www.mhlw.go.jp/toukei/itiran/roudou/chingin/kouzou/z2021/dl/01.pdf>.
